# Supplementary material for: Deep Learning in Alzheimer's Disease: Diagnostic Classification and Prognostic Prediction Using Neuroimaging Data
Source: PubMed Central journal article supplement (PMC6710444; doi:10.3389/fnagi.2019.00220), 2019-08-20
Supplement: Data_Sheet_1.pdf [file Data_Sheet_1.pdf]

## *Supplementary Material*

# Deep Learning in Alzheimer's Disease: Diagnostic Classification and Prognostic Prediction using Neuroimaging Data

**Taeho Jo<sup>1-3\*</sup>, Kwangsik Nho<sup>1-3</sup>, Andrew J. Saykin<sup>1-3</sup>**

<sup>1</sup>Center for Neuroimaging, Department of Radiology and Imaging Sciences, Indiana University School of Medicine, Indianapolis, IN, USA<sup>2</sup>Indiana Alzheimer Disease Center, Indiana University School of Medicine, Indianapolis, IN, USA

<sup>3</sup>Indiana University Network Science Institute, Bloomington, IN, USA

\* **Correspondence:** Corresponding Author [tjo@iu.edu](mailto:tjo@iu.edu)

### Supplement 1. Weights calculation in the backpropagation

After the initial error value is calculated from the given random weight by the least squares method, the weights are updated until the differential value becomes 0. The differential value 0 means there is no change in weight when the gradient is subtracted from the previous weight. In Fig. 1, the  $w_{31}$  is updated by following formula:

$$w_{31}(t + 1) = w_{31}t - \frac{\partial ErrorY_{out}}{\partial w_{31}}$$

$$ErrorY_{out} = \frac{1}{2}(y_{t1} - y_{o1})^2 + \frac{1}{2}(y_{t2} - y_{o2})^2$$

The  $ErrorY_{out}$  is the sum of error  $y_{o1}$  and error  $y_{o2}$ .  $y_{t1}$ ,  $y_{t2}$  are constants that are known through the given data. The partial derivative of  $ErrorY_{out}$  with respect to  $w_{31}$  can be calculated by the chain rule as follows.

$$\frac{\partial ErrorY_{out}}{\partial w_{31}} = \frac{\partial ErrorY_{out}}{\partial y_{o1}} \cdot \frac{\partial y_{o1}}{\partial net3} \cdot \frac{\partial net3}{\partial w_{31}}$$

(i)                      (ii)                      (iii)

Here, (i) becomes  $y_{o1} - y_{t1}$  which is the partial derivative of  $\frac{1}{2}(y_{t1} - y_{o1})^2$  with respect to  $y_{o1}$ . When activation function  $\sigma(x)$  is  $\frac{1}{1+e^{-x}}$ ,  $\frac{d\sigma(x)}{dx} = \sigma(x) \cdot (1 - \sigma(x))$  which makes (ii)  $y_{o1} \cdot (1 - y_{o1})$ . Since  $Net_3$  is  $w_{31}y_{h1} + w_{41}y_{h2} + bias$ , the partial derivative of  $Net_3$  with respect to  $w_{31}$ , which (iii), is  $y_{h1}$ .

$$w_{31}(t + 1) = w_{31}t - (y_{o1} - y_{t1})y_{o1}(1 - y_{o1})y_{h1}$$

To update  $W_{11}$  in hidden layer, it is also started from  $ErrorY_{out}$ , since  $Y_h$  is located in the hidden layer and is not exposed.

$$w_{11}(t+1) = w_{11}t - \frac{\partial ErrorY_{out}}{\partial w_{11}}$$

$$\frac{\partial ErrorY_{out}}{\partial w_{11}} = \frac{\partial ErrorY_{out}}{\partial y_{h1}} \cdot \frac{\partial y_{h1}}{\partial net_1} \cdot \frac{\partial net_1}{\partial w_{11}}$$

(i)

Here, the calculation of (i) is a bit different from previous. Since  $ErrorY_{out}$  includes  $Error_{o1}$  and  $Error_{o2}$ , it is calculated as follows.

$$\frac{\partial ErrorY_{out}}{\partial h_1} = \frac{\partial (Error_{o1} + Error_{o2})}{\partial y_{h1}} = \frac{\partial Error_{o1}}{\partial y_{h1}} + \frac{\partial Error_{o2}}{\partial y_{h1}}$$

(a)                      (b)

(a), (b) is calculated as follows by the chain rule.

$$(a) \frac{\partial Error_{o1}}{\partial y_{h1}} = \frac{\partial Error_{o1}}{\partial net_3} \cdot \frac{\partial net_3}{\partial y_{h1}} = (y_{o1} - y_{t1})y_{o1}(1 - y_{o1})y_{o1}$$

$$(b) \frac{\partial Error_{o2}}{\partial y_{h1}} = \frac{\partial Error_{o2}}{\partial net_4} \cdot \frac{\partial net_4}{\partial y_{h1}} = (y_{o2} - y_{t2})y_{o2}(1 - y_{o2})y_{o2}$$

Now, (i), (ii), and (iii) are summarized as follows.

$$\frac{\partial ErrorY_{out}}{\partial w_{11}} = \frac{\partial ErrorY_{out}}{\partial y_{h1}} \cdot \frac{\partial y_{h1}}{\partial net_1} \cdot \frac{\partial net_1}{\partial w_{11}}$$

$$= (\delta y_{o1} y_{o1} - \delta y_{o2} y_{o2}) y_{h1} (1 - y_{h1}) x_1$$

## Supplement 2. Advanced gradient descent methods

Nesterov Momentum is the method of adding the value of  $\gamma v_{(t-1)}$  to the Momentum SGD to find the gradient. This allows to reduce unnecessary movements by advance movement in the direction to move.

$$w_{(t+1)} = w_t + \gamma v_{(t-1)} - \eta \frac{\partial Error}{\partial (w + \gamma v_{(t-1)})}$$

Adagrad(Adaptive Gradient) is an optimization method that adjusts the learning rate according to the number of update of variables.

$$\mathbf{G}_t = \mathbf{G}_{(t-1)} + \left(\frac{\partial \mathbf{Error}}{\partial \mathbf{w}_t}\right)^2$$

$$\mathbf{w}_{(t+1)} = \mathbf{w}_t - \eta \frac{1}{\sqrt{\mathbf{G}_t + \epsilon}} \frac{\partial \mathbf{Error}}{\partial \mathbf{w}_t}$$

Here, RMSprop is the method of adjusting the ratio between the previous value and the modified value.

$$\mathbf{G}_t = \gamma \mathbf{G}_{(t-1)} + (1 - \gamma) \left(\frac{\partial \mathbf{Error}}{\partial \mathbf{w}_t}\right)^2$$

$$\mathbf{w}_{(t+1)} = \mathbf{w}_t - \eta \frac{1}{\sqrt{\mathbf{G}_t + \epsilon}} \frac{\partial \mathbf{Error}}{\partial \mathbf{w}_t}$$

Adam, the most popular optimization method for deep learning today, takes advantage of momentum SGD and RMSprop. Adam is expressed as follows. Where  $\mathbf{G}_t$  is the sum of the square of the modified gradient.  $\epsilon$  is a very small constant that prevents it from being divided by zero.

$$\mathbf{V}_t = \gamma \mathbf{G}_{(t-1)} + (1 - \gamma_1) \frac{\partial \mathbf{Error}}{\partial \mathbf{w}_t}$$

$$\mathbf{G}_t = \gamma \mathbf{G}_{(t-1)} + (1 - \gamma_2) \left(\frac{\partial \mathbf{Error}}{\partial \mathbf{w}_t}\right)^2$$

$$\hat{\mathbf{V}}_t = \frac{\mathbf{V}_t}{1 - \gamma_1^t} \quad \hat{\mathbf{G}}_t = \frac{\mathbf{G}_t}{1 - \gamma_2^t}$$

$$\mathbf{w}_{(t+1)} = \mathbf{w}_t - \eta \frac{\hat{\mathbf{G}}_t}{\sqrt{\hat{\mathbf{V}}_t + \epsilon}}$$

## Supplement 3.

Table S1. All the results of the 16 studies to systematically be reviewed

| Author (year)                 | Modality    | Data processing, training   | Classifier          | AD  | cMCI | ncMCI | NC  | Total | Acc. AD/NC   | STD  | Acc. MCI conversion | STD   |
|-------------------------------|-------------|-----------------------------|---------------------|-----|------|-------|-----|-------|--------------|------|---------------------|-------|
| <b>Suk et al. (2015)</b>      | MRI,PET,CSF | SAE + sparse learning       | SVM                 | 51  | 43   | 56    | 52  | 202   | <b>98.8</b>  | 0.4  | <b>83.3</b>         | 2.1   |
| <b>Choi and Jin (2018)</b>    | PET         | 3D CNN                      | softmax             | 139 | 79   | 92    | 182 | 492   | <b>96</b>    |      | <b>84.2</b>         |       |
| <b>Suk and Shen (2013)</b>    | MRI,PET,CSF | SAE                         | SVM                 | 51  | 43   | 56    | 52  | 202   | <b>95.9</b>  | 1.1  | <b>75.8</b>         | 2     |
| <b>Suk et al. (2014)</b>      | MRI,PET     | DBM                         | SVM                 | 93  | 76   | 128   | 101 | 398   | <b>95.35</b> | 5.23 | <b>75.92</b>        | 15.37 |
| <b>Li et al. (2014)</b>       | MRI, PET    | 3D CNN                      | Logistic regression | 198 | 167  | 236   | 229 | 830   | <b>92.87</b> | 2.07 | <b>72.44</b>        | 2.41  |
| <b>Suk et al. (2015)</b>      | MRI         | SAE + sparse learning       | SVM                 | 51  | 43   | 56    | 52  | 202   | <b>92.4</b>  | 1.5  | <b>69.3</b>         | 2     |
| <b>Suk et al. (2014)</b>      | MRI         | DBM                         | SVM                 | 93  | 76   | 128   | 101 | 398   | <b>92.38</b> | 5.32 | <b>72.42</b>        | 13.09 |
| <b>Suk et al. (2014)</b>      | PET         | DBM                         | SVM                 | 93  | 76   | 128   | 101 | 398   | <b>92.2</b>  | 6.7  | <b>70.25</b>        | 13.23 |
| <b>Li et al. (2014)</b>       | MRI         | 3D CNN                      | Logistic regression | 198 | 167  | 236   | 229 | 830   | <b>91.92</b> | 1.88 | <b>71.68</b>        | 2.53  |
| <b>Aderghal et al. (2017)</b> | MRI         | 2D CNN                      | softmax             | 188 | 399  |       | 228 | 815   | <b>91.41</b> |      |                     |       |
| <b>Li et al. (2015)</b>       | MRI,PET,CSF | RBM + Drop out              | SVM                 | 51  | 43   | 56    | 52  | 202   | <b>91.4</b>  | 1.8  | <b>57.4</b>         | 3.6   |
| <b>Liu et al. (2015)</b>      | MRI,PET     | SAE with zero-masking       | softmax             | 77  | 67   | 102   | 85  | 331   | <b>91.4</b>  | 5.56 |                     |       |
| <b>Liu et al. (2018a)</b>     | PET         | RNN                         | softmax             | 93  | 146  |       | 100 | 339   | <b>91.2</b>  |      |                     |       |
| <b>Vu et al. (2017)</b>       | MRI, PET    | SAE + 3D CNN                | softmax             | 145 |      |       | 172 | 317   | <b>91.14</b> |      |                     |       |
| <b>Liu et al. (2018b)</b>     | MRI         | Landmark detection + 3D CNN | softmax             | 159 | 38   | 239   | 200 | 636   | <b>91.09</b> |      | <b>76.9</b>         |       |
| <b>Cheng and Liu (2017)</b>   | MRI,PET     | 3D CNN + 2D CNN             | softmax             | 93  |      |       | 100 | 193   | <b>89.64</b> |      |                     |       |
| <b>Suk et al. (2015)</b>      | PET         | SAE + sparse learning       | SVM                 | 51  | 43   | 56    | 52  | 202   | <b>88.7</b>  | 2.7  | <b>68.9</b>         | 3.8   |
| <b>Li et al. (2014)</b>       | PET         | 3D CNN                      | Logistic regression | 198 | 167  | 236   | 229 | 830   | <b>87.62</b> | 2.36 | <b>70.29</b>        | 2.45  |
| <b>Liu et al. (2014)</b>      | MRI,PET     | SAE+NN                      | softmax             | 65  | 67   | 102   | 77  | 311   | <b>87.76</b> |      |                     |       |
| <b>Cheng et al. (2017)</b>    | MRI         | 3D CNN                      | softmax             | 199 |      |       | 229 | 428   | <b>87.15</b> |      |                     |       |
| <b>Cheng and Liu (2017)</b>   | PET         | 3D CNN + 2D CNN             | softmax             | 93  |      |       | 100 | 193   | <b>87.13</b> |      |                     |       |
| <b>Cheng and Liu (2017)</b>   | MRI         | 3D CNN + 2D CNN             | softmax             | 93  |      |       | 100 | 193   | <b>85.47</b> |      |                     |       |
| <b>Lu et al. (2018)</b>       | MRI,PET     | DNN + NN                    | softmax             | 238 | 217  | 409   | 360 | 1224  | <b>84.6</b>  | 1.5  | <b>82.93</b>        | 7.25  |
| <b>Lu et al. (2018)</b>       | PET         | DNN + NN                    | softmax             | 238 | 217  | 409   | 360 | 1224  | <b>84.5</b>  | 1.4  | <b>81.53</b>        | 7.42  |
| <b>Lu et al. (2018)</b>       | MRI         | DNN + NN                    | softmax             | 238 | 217  | 409   | 360 | 1224  | <b>81.9</b>  | 1.2  | <b>75.44</b>        | 7.74  |
| <b>Korolev et al. (2017)</b>  | MRI         | 3D CNN                      | softmax             | 50  |      |       | 61  | 111   | <b>80</b>    | 7    |                     |       |
| <b>Suk et al. (2015)</b>      | CSF         | SAE + sparse learning       | SVM                 | 51  | 43   | 56    | 52  | 202   | <b>79.7</b>  | 1.4  | <b>57.7</b>         | 3     |

All data on this table were from ADNI.  
<https://github.com/rasmusbergpalm/DeepLearnToolbox> (Suk et al. (2015), Suk and Shen (2013))  
[https://github.com/neuro-ml/resnet\\_cnn\\_mri\\_adni](https://github.com/neuro-ml/resnet_cnn_mri_adni) (Korolev et al. (2017))

## Reference

- Aderghal, K., Benois-Pineau, J., Afdel, K., and Catheline, G. (2017). "FuseMe: Classification of sMRI images by fusion of Deep CNNs in 2D+E projections", in: *Proceedings of the 15th International Workshop on Content-Based Multimedia Indexing*.
- Cheng, D., Liu, M., Fu, J., and Wang, Y. (2017). "Classification of MR brain images by combination of multi-CNNs for AD diagnosis", in: *Ninth International Conference on Digital Image Processing (ICDIP 2017)*: SPIE, 5.
- Cheng, D., and Liu, M. (2017). "CNNs based multi-modality classification for AD diagnosis", in: *2017 10th International Congress on Image and Signal Processing, BioMedical Engineering and Informatics (CISP-BMEI)*, 1-5.
- Choi, H., and Jin, K.H. (2018). Predicting cognitive decline with deep learning of brain metabolism and amyloid imaging. *Behavioural Brain Research* 344, 103-109.
- Korolev, S., Safiullin, A., Belyaev, M., and Dodonova, Y. (2017). "Residual and plain convolutional neural networks for 3D brain MRI classification", in: *2017 IEEE 14th International Symposium on Biomedical Imaging (ISBI 2017)*, 835-838.
- Li, R., Zhang, W., Suk, H.-I., Wang, L., Li, J., Shen, D., and Ji, S. (2014). Deep learning based imaging data completion for improved brain disease diagnosis. *Medical image computing and computer-assisted intervention : MICCAI ... International Conference on Medical Image Computing and Computer-Assisted Intervention* 17, 305-312.
- Li, F., Tran, L., Thung, K.-H., Ji, S., Shen, D., and Li, J. (2015). A Robust Deep Model for Improved Classification of AD/MCI Patients. *IEEE journal of biomedical and health informatics* 19, 1610-1616.
- Liu, M., Cheng, D., Yan, W., and , A.S.D.N.I. (2018a). Classification of Alzheimer's Disease by Combination of Convolutional and Recurrent Neural Networks Using FDG-PET Images. *Frontiers in Neuroinformatics* 12.
- Liu, S., Liu, S., Cai, W., Pujol, S., Kikinis, R., and Feng, D. (2014). "Early diagnosis of Alzheimer's disease with deep learning", in: *2014 IEEE 11th International Symposium on Biomedical Imaging (ISBI)*, 1015-1018.
- Liu, S., Liu, S., Cai, W., Che, H., Pujol, S., Kikinis, R., Feng, D., Fulham, M.J., and Adni (2015). Multimodal Neuroimaging Feature Learning for Multiclass Diagnosis of Alzheimer's Disease. *IEEE Transactions on Biomedical Engineering* 62, 1132-1140.
- Liu, M., Zhang, J., Adeli, E., and Shen, D. (2018b). Landmark-based deep multi-instance learning for brain disease diagnosis. *Medical Image Analysis* 43, 157-168.
- Lu, D., Popuri, K., Ding, G.W., Balachandar, R., and Beg, M.F. (2018). Multimodal and Multiscale Deep Neural Networks for the Early Diagnosis of Alzheimer's Disease using structural MR and FDG-PET images. *Scientific Reports* 8, 5697.
- Suk, H.-I., and Shen, D. (2013). Deep Learning-Based Feature Representation for AD/MCI Classification. *Medical image computing and computer-assisted intervention : MICCAI ...*

*International Conference on Medical Image Computing and Computer-Assisted Intervention* 16, 583-590.

Suk, H.-I., Lee, S.-W., Shen, D., and The Alzheimers Disease Neuroimaging, I. (2014). Hierarchical Feature Representation and Multimodal Fusion with Deep Learning for AD/MCI Diagnosis. *NeuroImage* 101, 569-582.

Suk, H.-I., Lee, S.-W., Shen, D., and The Alzheimer's Disease Neuroimaging, I. (2015). Latent feature representation with stacked auto-encoder for AD/MCI diagnosis. *Brain structure & function* 220, 841-859.

Vu, T.D., Yang, H.-J., Nguyen, V.Q., Oh, A.R., and Kim, M.-S. (2017). "Multimodal learning using convolution neural network and Sparse Autoencoder", in: *2017 IEEE International Conference on Big Data and Smart Computing (BigComp)*, 309-312.
